# Supplementary material
Source: publisher figshare collection journal article supplement (https://acs.figshare.com/ndownloader/files/12978290)
Supplement: Supplementary file 1 [file 12978290]

## *Supporting information*

# **Reversible $pK_a$ Modulation of Carboxylic Acids in Temperature-Responsive Nanoparticles through Imprinted Electrostatic Interactions**

Yu Hoshino\*, Toshiki Jibiki, Masahiko Nakamoto, Yoshiko Miura,  
Department of Chemical Engineering, Kyushu University, 744 Motooka, Nishi-ku, Fukuoka 819-0395,  
Japan

Correspondence to: [yhoshino@chem-eng.kyushu-u.ac.jp](mailto:yhoshino@chem-eng.kyushu-u.ac.jp)

**This PDF file includes:**

Table S1 to S8

Figure S0 to S13

Scheme S1 and S2

**Table S1.** Polymerization conditions and yields of AxDy NPs.

|          | Polymerization<br>pH | NIPAm<br>(mol%)/(mg) | BIS<br>(mol%)/(mg) | AAc<br>(mol%)/(μL) | DMA<br>(mol%)/(μL) | Reaction scale of<br>polymerization<br>(mL) | Yield of NPs<br>(%) |
|----------|----------------------|----------------------|--------------------|--------------------|--------------------|---------------------------------------------|---------------------|
| A2.0D0.0 | 3.1                  | 96.0 / 1694.7        | 2.0 / 48.1         | 2.0 / 21.4         | 0.0 / 0.0          | 50                                          | 74                  |
| A1.5D3.5 | 3.1                  | 93.0 / 3283.5        | 2.0 / 96.2         | 1.5 / 32.1         | 3.5 / 179.2        | 100                                         | 79                  |
| A1.5D5.0 | 3.1                  | 91.5 / 3230.5        | 2.0 / 96.2         | 1.5 / 32.1         | 5.0 / 256.0        | 100                                         | 83                  |
| A3.0D0.0 | 3.0                  | 95.0 / 3354.1        | 2.0 / 96.2         | 3.0 / 64.2         | 0.0 / 0.0          | 100                                         | 79                  |
| A2.5D3.5 | 3.1                  | 92.0 / 3248.7        | 2.0 / 96.2         | 2.5 / 53.5         | 3.5 / 179.2        | 100                                         | 78                  |
| A2.5D5.0 | 3.1                  | 90.5 / 3195.2        | 2.0 / 96.2         | 2.5 / 53.5         | 5.0 / 256.0        | 100                                         | 86                  |
| A2.5D7.0 | 3.1                  | 88.5 / 3124.6        | 2.0 / 96.2         | 2.5 / 53.5         | 7.0 / 358.4        | 100                                         | 79                  |
| A5.0D0.0 | 3.1                  | 95.0 / 3354.0        | 2.0 / 96.2         | 5.0 / 107.0        | 0.0 / 0.0          | 100                                         | 76                  |
| A5.0D3.5 | 3.1                  | 94.0 / 3318.8        | 2.0 / 96.2         | 5.0 / 107.0        | 3.5 / 179.2        | 100                                         | 80                  |

**Table S2.** Incorporation of ionic groups and  $pK_a$  values of AAc in AxDy NPs.

|          | Incorporation of<br>AAc<br>(mol%) | Incorporation of<br>DMA<br>(mol%) | $pK_a$ of AAc<br>(10°C) | $pK_a$ of AAc<br>(75°C) |
|----------|-----------------------------------|-----------------------------------|-------------------------|-------------------------|
| A2.0D0.0 | 1.9                               | 0.0                               | 4.8                     | 7.1                     |
| A1.5D3.5 | 2.0                               | 1.8                               | 4.9                     | 5.6                     |
| A1.5D5.0 | 1.5                               | 3.5                               | 4.7                     | 5.4                     |
| A3.0D0.0 | 3.1                               | 0.0                               | 5.2                     | 7.3                     |
| A2.5D3.5 | 3.3                               | 2.3                               | 4.9                     | 5.4                     |
| A2.5D5.0 | 2.8                               | 3.7                               | 4.9                     | 5.5                     |
| A2.5D7.0 | 2.6                               | 5.9                               | 4.7                     | 5.4                     |
| A5.0D0.0 | 5.5                               | 0.0                               | 4.9                     | 7.2                     |
| A5.0D3.5 | 5.7                               | 2.0                               | 4.8                     | 6.7                     |

**Table S3.** Polymerization conditions and yields of pDMAAm.

|                  | Polymerization<br>pH | DMAAm<br>(mol%)/(mg) | AAc<br>(mol%)/(μL) | DMA<br>(mol%)/(μL) | Reaction scale of<br>polymerization<br>(mL) | Yield of NPs<br>(%) |
|------------------|----------------------|----------------------|--------------------|--------------------|---------------------------------------------|---------------------|
| pDMAAm (AAc)     | 3.0                  | 98.0 / 1575.3        | 2.0 / 21.3         | -                  | 50                                          | 67                  |
| pDMAAm (AAc+DMA) | 3.0                  | 94.5 / 1519.1        | 2.0 / 21.3         | 3.5 / 89.6         | 50                                          | 53                  |

**Table S4.** Incorporation of ionic groups and  $pK_a$  values of AAc in pDMAAm.

|                  | Incorporation of<br>AAc<br>(mol%) | Incorporation of<br>DMA<br>(mol%) | $pK_a$ of AAc<br>(10°C) | $pK_a$ of AAc<br>(75°C) |
|------------------|-----------------------------------|-----------------------------------|-------------------------|-------------------------|
| pDMAAm (AAc)     | 2.9                               | 0.0                               | 4.8                     | 5.2                     |
| pDMAAm (AAc+DMA) | 2.5                               | 3.9                               | 4.6                     | 4.8                     |

**Table S5.** Polymerization conditions and yields of (AAc + cations) NPs.

|         | Polymerization<br>pH | NIPAm<br>(mol%)/(mg) | BIS<br>(mol%)/(mg) | AAc<br>(mol%)/(μL) | Cationic<br>monomer<br>(mol%)/(mg) | Cationic<br>monomer<br>species | Reaction scale of<br>polymerization<br>(mL) | Yield of NPs<br>(%) |
|---------|----------------------|----------------------|--------------------|--------------------|------------------------------------|--------------------------------|---------------------------------------------|---------------------|
| AAc     | 3.0                  | 95.0 / 3354.1        | 2.0 / 96.2         | 3.0 / 64.2         | -                                  | -                              | 100                                         | 79                  |
| AAc+ATA | 3.0                  | 90.5 / 3195.2        | 2.0 / 96.2         | 2.5 / 53.5         | 5.0 / 322.5                        | ATA                            | 100                                         | 68                  |
| AAc+DMA | 3.1                  | 90.5 / 3195.2        | 2.0 / 96.2         | 2.5 / 53.5         | 5.0 / 243.7                        | DMA                            | 100                                         | 86                  |
| AAc+APM | 3.0                  | 90.5 / 3195.2        | 2.0 / 96.2         | 2.5 / 53.5         | 5.0 / 278.8                        | APM                            | 100                                         | 72                  |
| AAc+GUA | 3.0                  | 90.5 / 3195.2        | 2.0 / 96.2         | 2.5 / 53.5         | 5.0 / 344.1                        | GUA                            | 100                                         | 71                  |

**Table S6.** Incorporation of ionic groups and  $pK_a$  values of AAc in (AAc + cations) NPs.

|         | Incorporation of<br>AAc<br>(mol%) | Incorporation of<br>Cationic group<br>(mol%) | Cationic<br>monomer<br>species | $pK_a$ of AAc<br>(10°C) | $pK_a$ of AAc<br>(75°C) |
|---------|-----------------------------------|----------------------------------------------|--------------------------------|-------------------------|-------------------------|
| AAc     | 3.1                               | 0.0                                          | -                              | 5.2                     | 7.3                     |
| AAc+ATA | 2.6                               | 3.4                                          | ATA                            | 4.8                     | 5.7                     |
| AAc+DMA | 2.8                               | 3.7                                          | DMA                            | 4.9                     | 5.5                     |
| AAc+APM | 2.7                               | 3.9                                          | APM                            | 4.9                     | 5.1                     |
| AAc+GUA | 2.5                               | 3.5                                          | GUA                            | 4.9                     | 5.0                     |

**Table S7.** Polymerization conditions and yields of (AAc + BGUA) NPs.

|                | Polymerization<br>pH | NIPAm<br>(mol%)/(mg) | TBAAm<br>(mol%)/(mg) | BIS<br>(mol%)/(mg) | AAc<br>(mol%)/(μL) | BGUA<br>(mol%)/(mg) | Reaction scale of<br>polymerization<br>(mL) | Yield of<br>NPs (%) |
|----------------|----------------------|----------------------|----------------------|--------------------|--------------------|---------------------|---------------------------------------------|---------------------|
| AAc+BGUA       | 4.0                  | 90.5 / 2715.9        | 0.0 / 0.0            | 2.0 / 81.8         | 2.5 / 45.5         | 5.0 / 510.5         | 170                                         | 75                  |
| AAc+BGUA+TBAAm | 4.0                  | 70.5 / 1866.8        | 20.0 / 595.3         | 2.0 / 72.2         | 2.5 / 40.1         | 5.0 / 450.5         | 150                                         | 77                  |
| AAc+BGUA+BIS   | 4.0                  | 50.5 / 1783.0        | 0.0 / 0.0            | 5.0 / 240.5        | 2.5 / 53.5         | 5.0 / 600.0         | 200                                         | 44                  |

**Table S8.** Incorporation of ionic groups and  $pK_a$  values of AAc in (AAc + BGUA) NPs.

|                | Incorporation of<br>AAc<br>(mol%) | Incorporation of<br>GUA<br>(mol%) | $pK_a$ of AAc<br>(10°C) | $pK_a$ of AAc<br>(75°C) |
|----------------|-----------------------------------|-----------------------------------|-------------------------|-------------------------|
| AAc+BGUA       | 2.7                               | 3.9                               | 4.7                     | 4.4                     |
| AAc+BGUA+TBAAm | 3.3                               | 4.8                               | 4.6                     | 4.0                     |
| AAc+BGUA+BIS   | 2.9                               | 4.2                               | 4.4                     | 4.0                     |

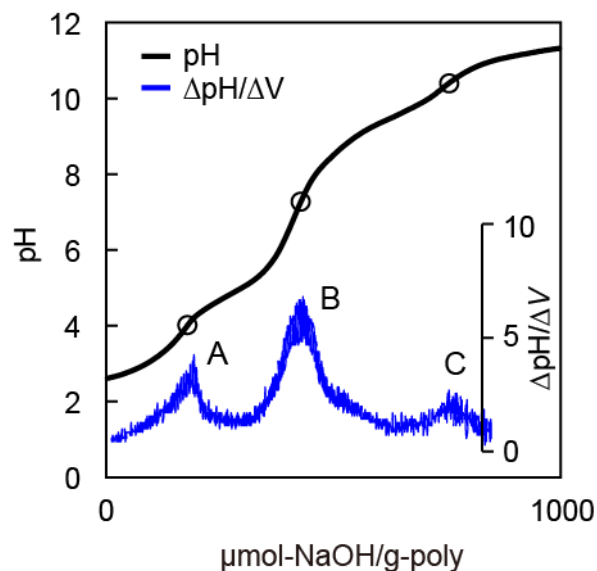

**Figure S0.** Acid–base titration curves for A2.5D5.0 NPs (black), and changes in pH ( $\Delta pH$ ) versus volume of NaOH added ( $\Delta V$ ) (blue). The three peaks in the blue line indicate neutralization of (A) HCl ( $HCl + NaOH \rightleftharpoons NaCl + H_2O$ ), (B) AAc ( $R-COOH + NaOH \rightleftharpoons R-COONa + H_2O$ ), and (C) DMA ( $R-NR_2HCl + NaOH \rightleftharpoons R-NR_2 + NaCl + H_2O$ ).

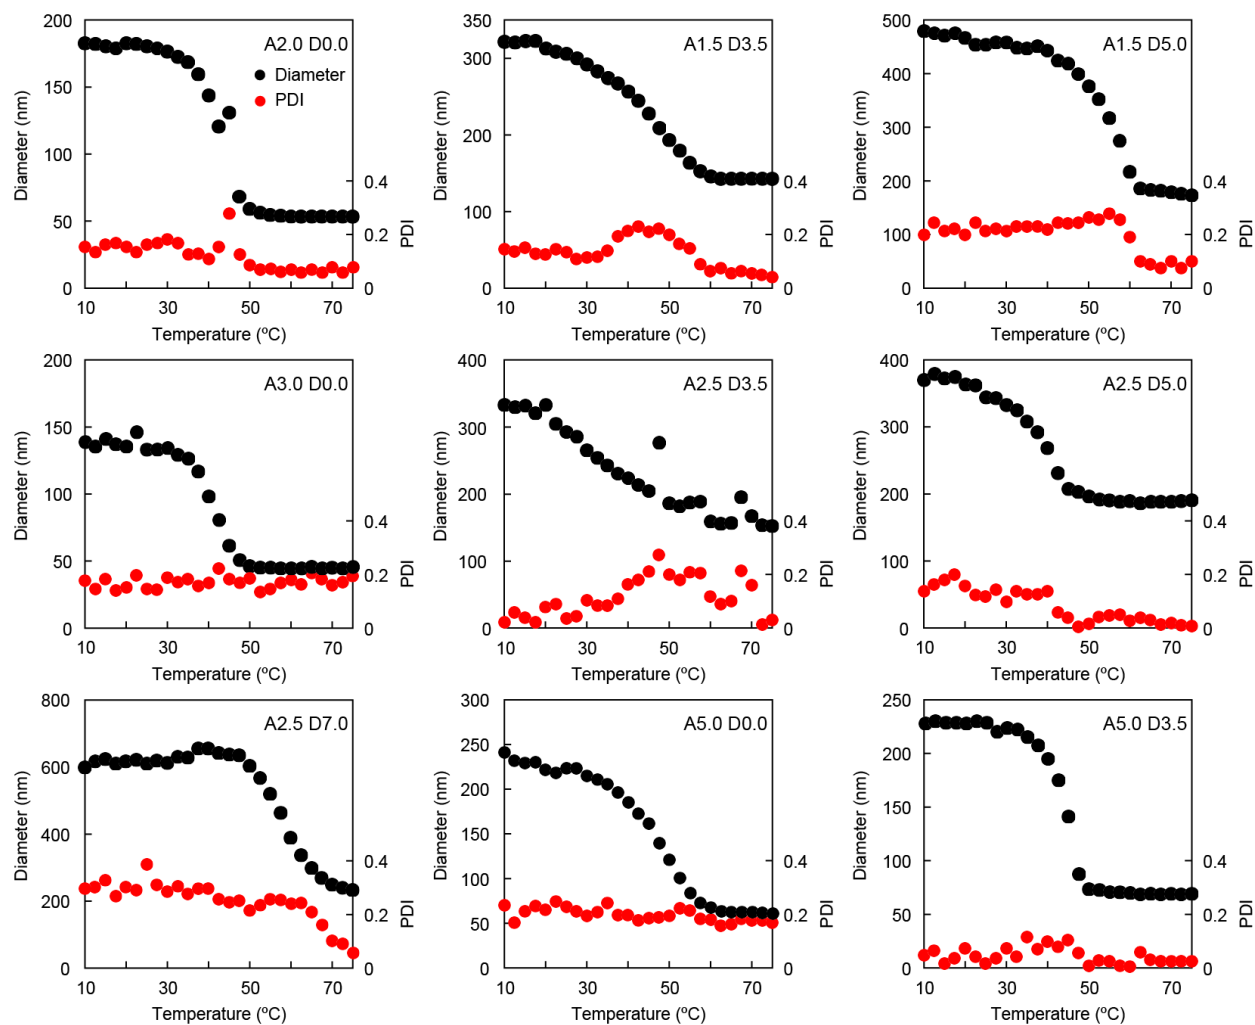

**Figure S1.** Hydrodynamic diameters (black) and PDI (red) of Ax/Dy NPs at 10–75 °C.

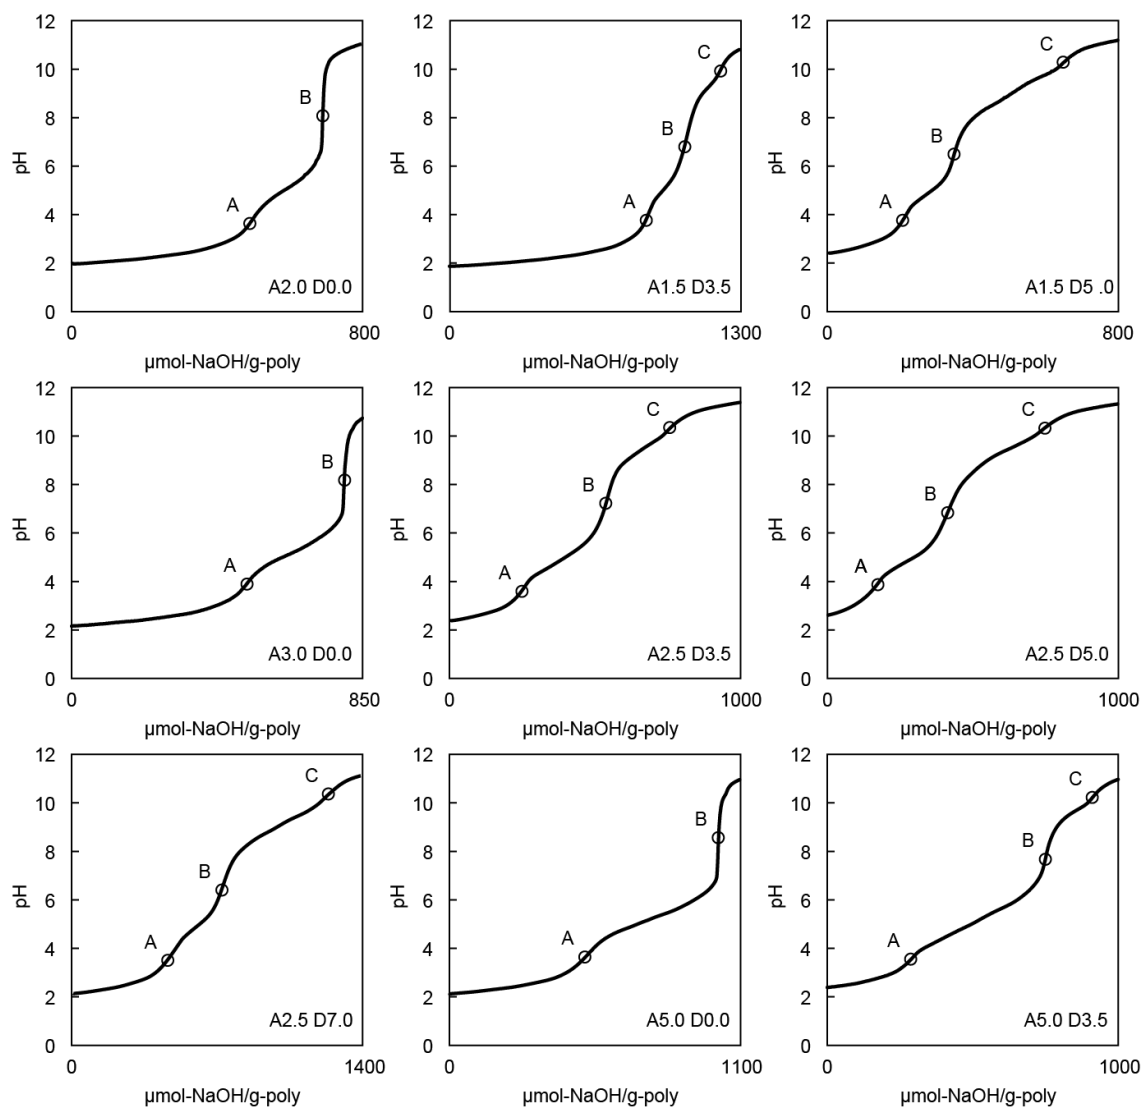

**Figure S2.** Acid–base titration curves for Ax Dy NPs. Plots A, B and C indicate neutralization point of HCl, carboxylic acids and ammonium ions, respectively.

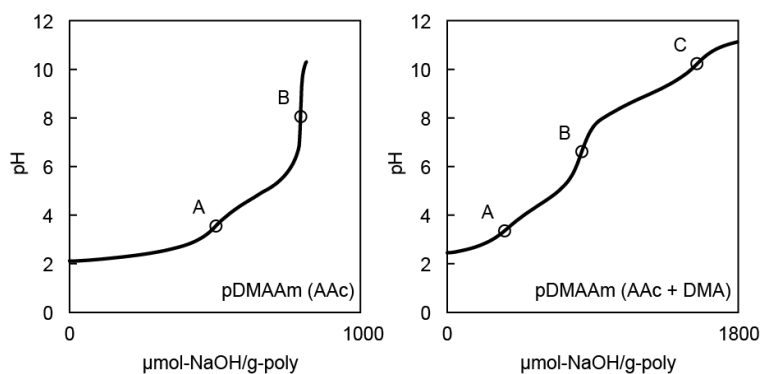

**Figure S3.** Acid–base titration curves for pDMAAm. Plots A, B and C indicate neutralization point of HCl, carboxylic acids and ammonium ions, respectively.

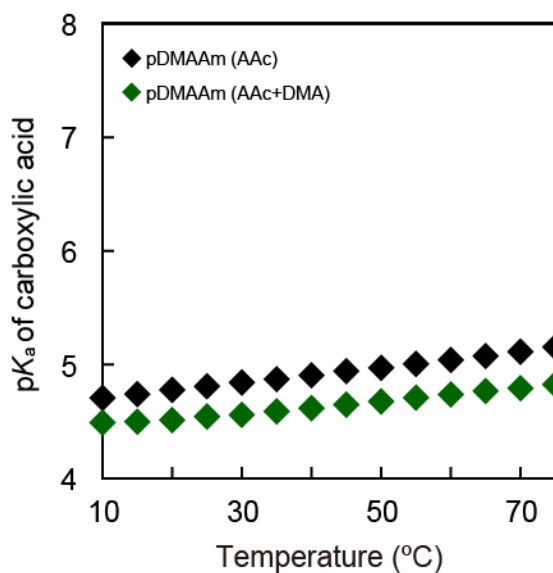

**Figure S4.** The  $pK_a$  values of carboxylic acids in pDMAAm (AAc) (black) and pDMAAm (AAc + DMA) (green) as a function of temperature.



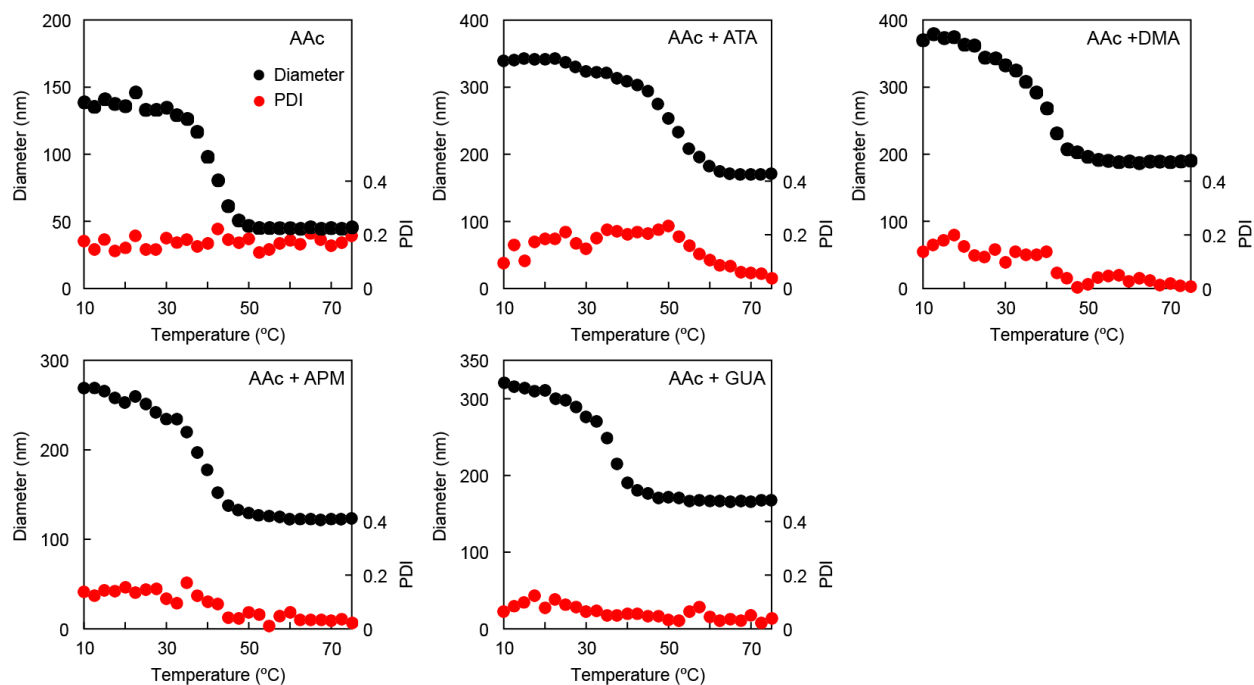

**Figure S5.** Hydrodynamic diameters (black) and PDI (red) of (AAc + cations) NPs at 10–75 °C.

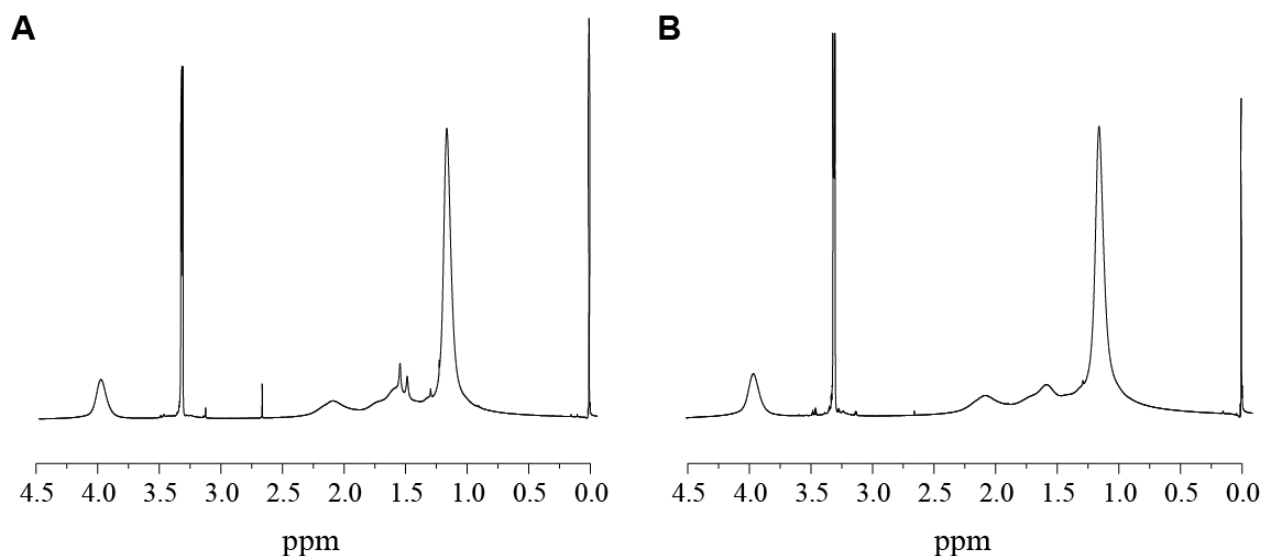

**Figure S6.**  $^1\text{H}$  NMR spectrum of (AAc + BGUA) NPs (A) after and (B) before deprotection in MeOD at room temperature. After deprotection, the two Boc peaks at around 1.5 ppm disappeared.

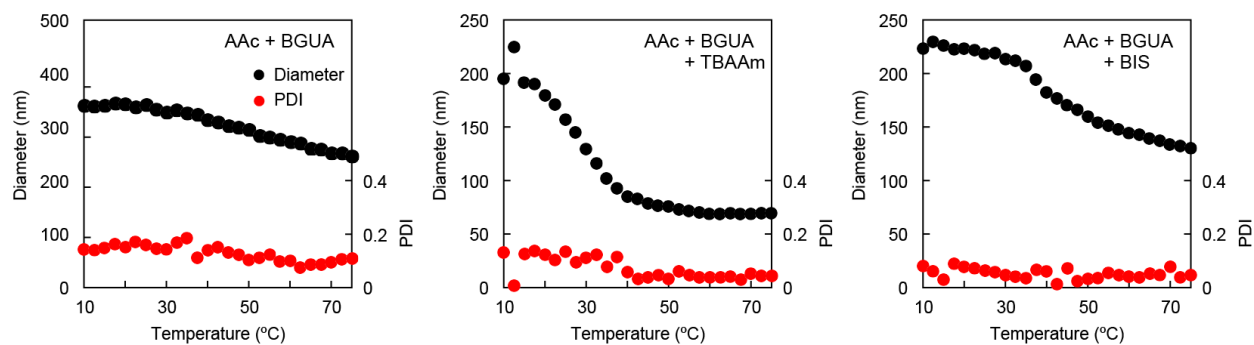

**Figure S7.** Hydrodynamic diameters (black) and PDI (red) of (AAc + BGUA) NPs at 10–75 °C.

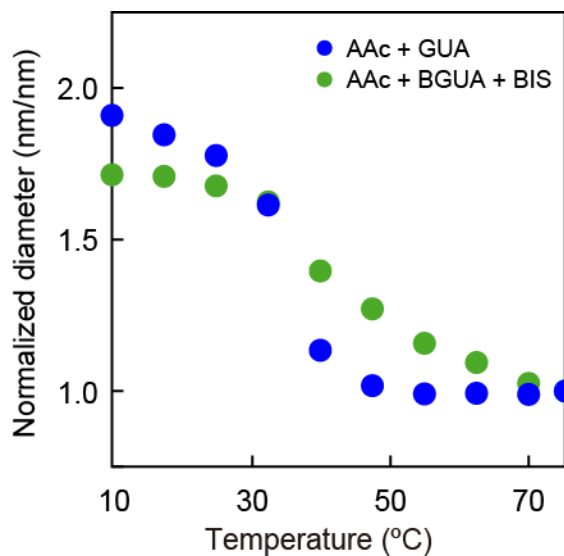

**Figure S8.** Hydrodynamic diameters of (AAc + GUA) NPs (blue) and (AAc + BGUA + BIS) NPs (light green), normalized by the diameter of each NP type at 75 °C, as a function of temperature.

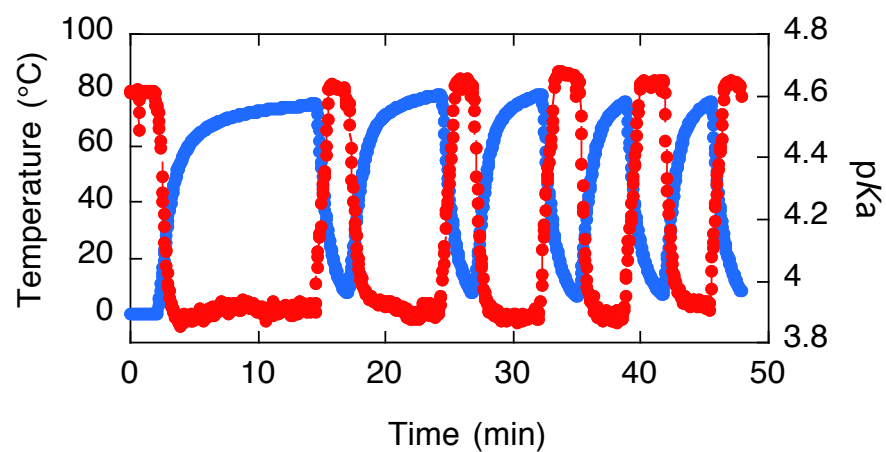

**Figure S9.**  $pK_a$  profile of carboxylic acids in (AAc + BGUA + TBAAm) NPs (red plots). Temperature of the solution (blue plots) was heated and cooled by hot water bath and ice bath respectively, and monitored by thermometer in the pH probe.

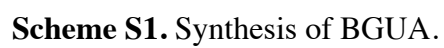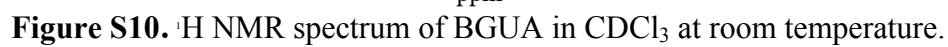

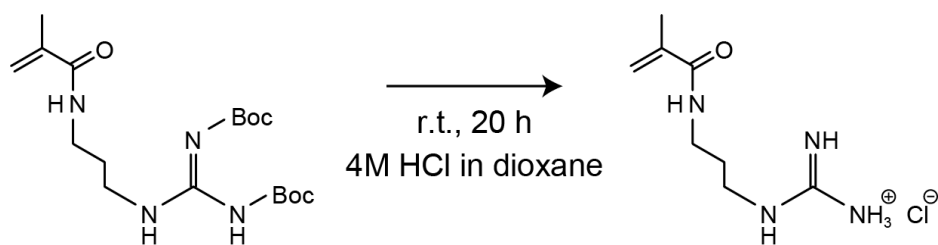

**Scheme S2.** Synthesis of GUA.

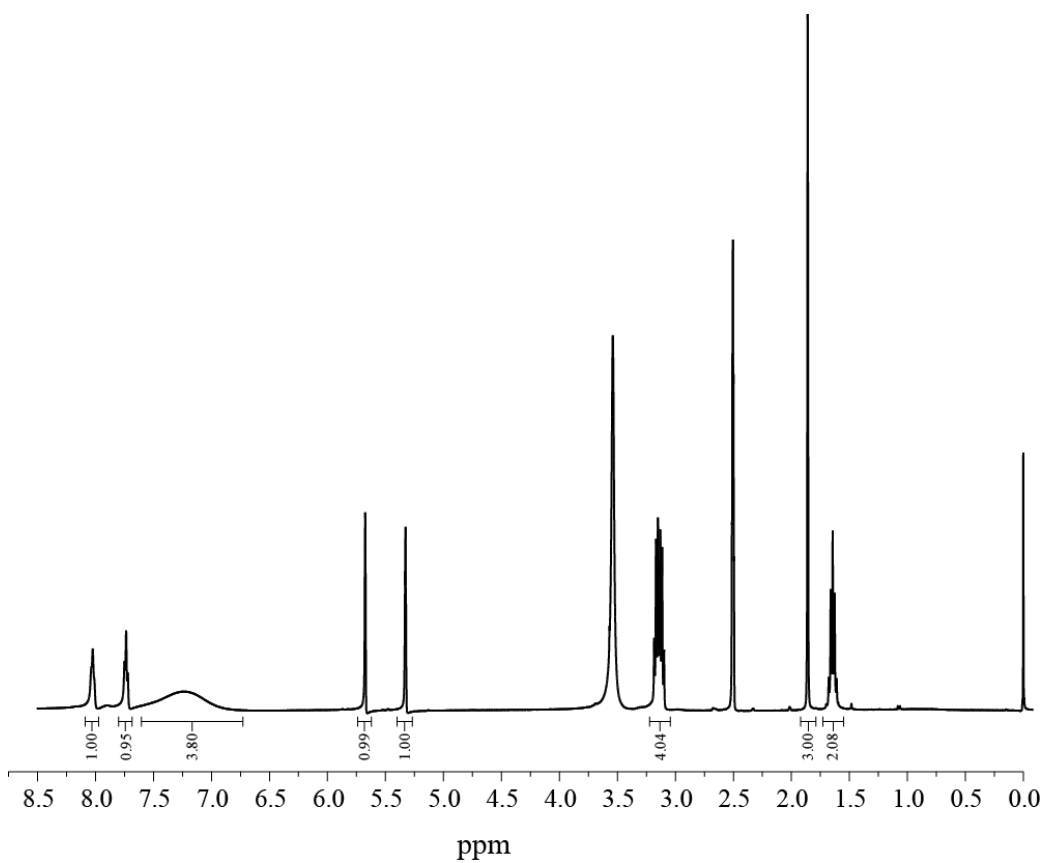

**Figure S11.**  $^1\text{H}$  NMR spectrum of GUA in  $\text{DMSO-}d_6$  at room temperature.

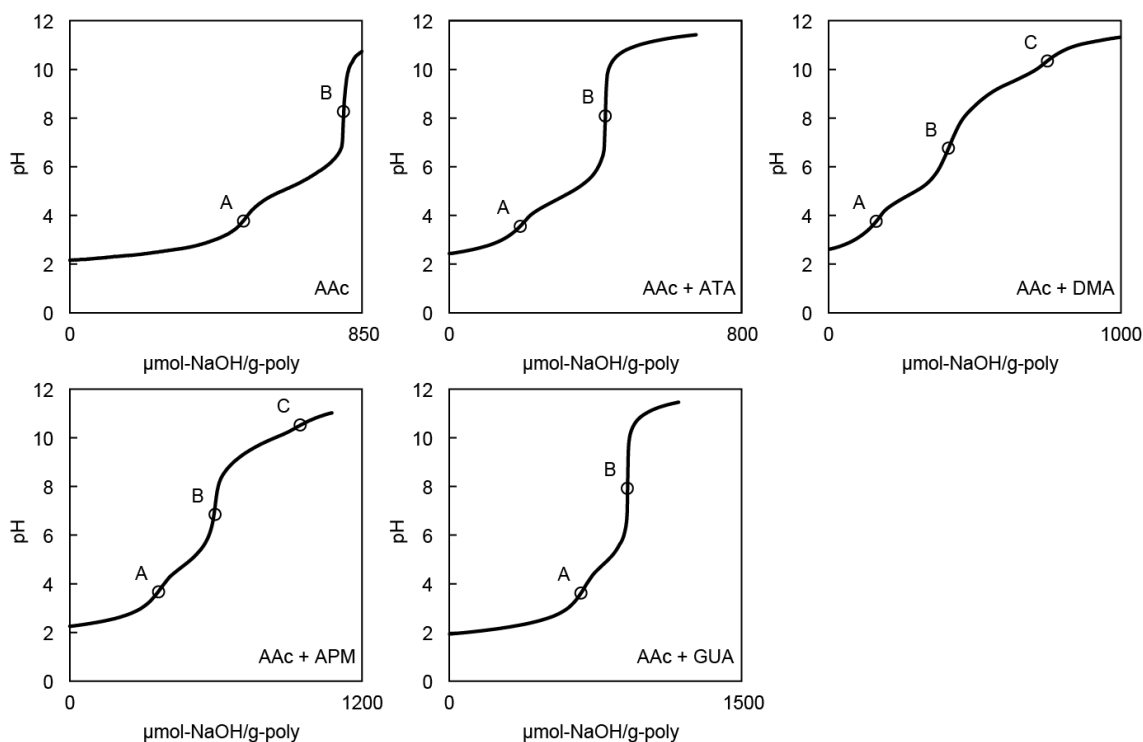

**Figure S12.** Acid–base titration curves for (AAc + cations) NPs. Plots A, B and C indicate neutralization point of HCl, carboxylic acids and cations, respectively. ATA and GUA have high  $pK_a$  values, so their neutralization points were not observed by this titration. Instead, the amounts of ATA and GUA introduced were determined by a back-titration method.

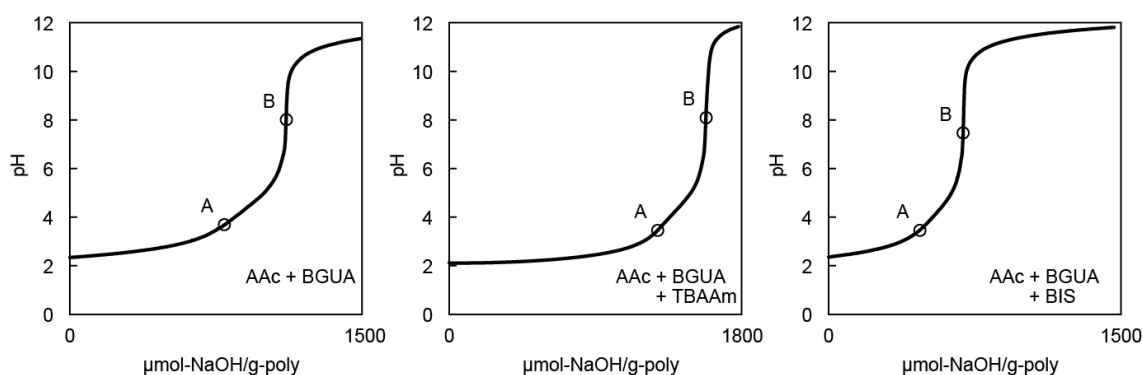

**Figure S13.** Acid–base titration curves for (AAc + BGUA) NPs. Plots A and B indicate neutralization point of HCl, carboxylic and acids, respectively. The amounts of GUA introduced were determined by a back-titration method.
